# Supplementary material for: Self-assembled nanostructures of phosphomolybdate, nucleobase and metal ions synthesis and their in vitro cytotoxicity studies on cancer cell lines
Source: Royal Society of Chemistry journal article supplement (doi:10.1039/d0tb01945c), 2020-01-01
Supplement: d0tb01945c1.pdf [file d0tb01945c1.pdf]

## Supporting Information

### Self-assembled nanostructures of phosphomolybdate, nucleobase and metal ions synthesis and their in vitro cytotoxicity studies on cancer cell lines

Hemraj Chhipa, Srinivasreddy Telukutla, Sarvesh K Soni, PR. Selvakannan\*, Suresh K Bhargava\*  
Centre for Advanced Materials and Industrial Chemistry, b. BioSciences and Food Technology, School  
of Science, RMIT University  
GPO Box 2476V, Melbourne,, VIC 3001, Australia

Email: [selvakannan.periasamy@rmit.edu.au](mailto:selvakannan.periasamy@rmit.edu.au) : [suresh.bhargava@rmit.edu.au](mailto:suresh.bhargava@rmit.edu.au)

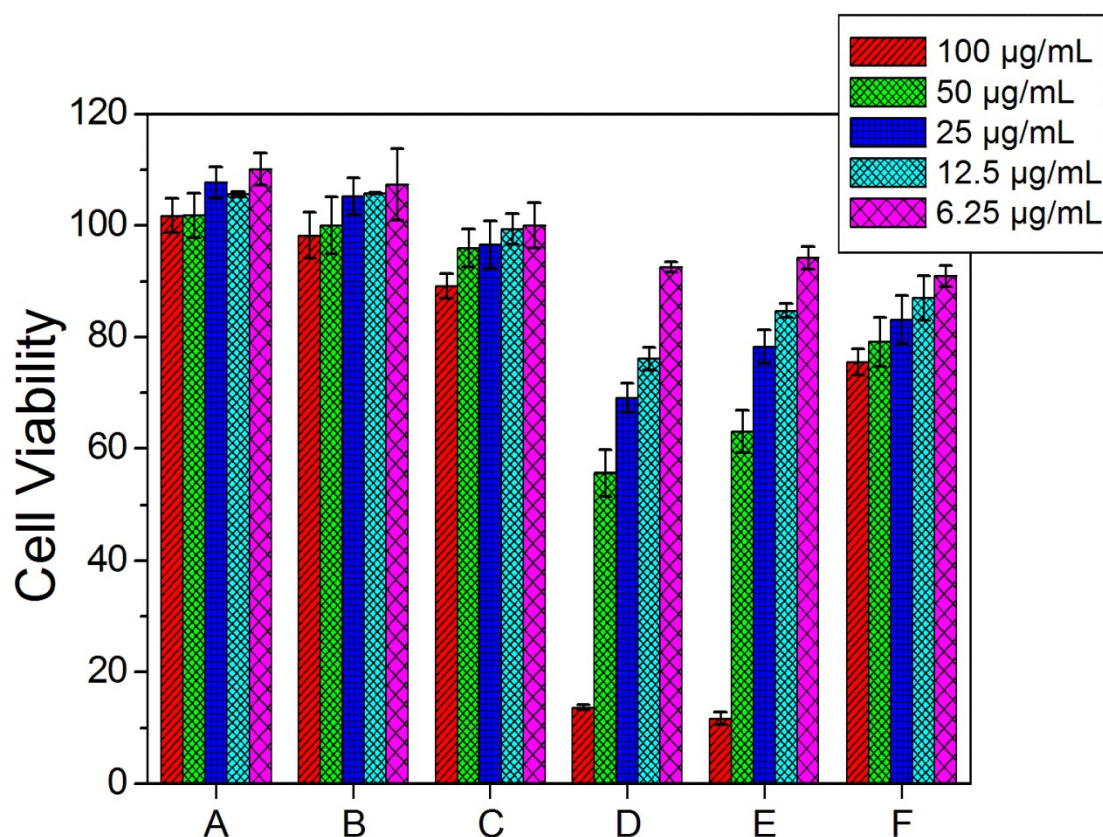

**Figure S1.** The cytotoxic effect of varying concentration of nano particles (6.25-100 µg/mL) on PC-3 cells (after 48 hours) has shown as cell viability vs the dose and time dependence. Results are presented as mean  $\pm$  standard deviation of 3 independent experiments. A – (PMA/A), B- (PMA/T), C- (PMA/A/Ag), D - (PMA/A/Au), E -(PMA/T/Ag), F- (PMA/T/Au)

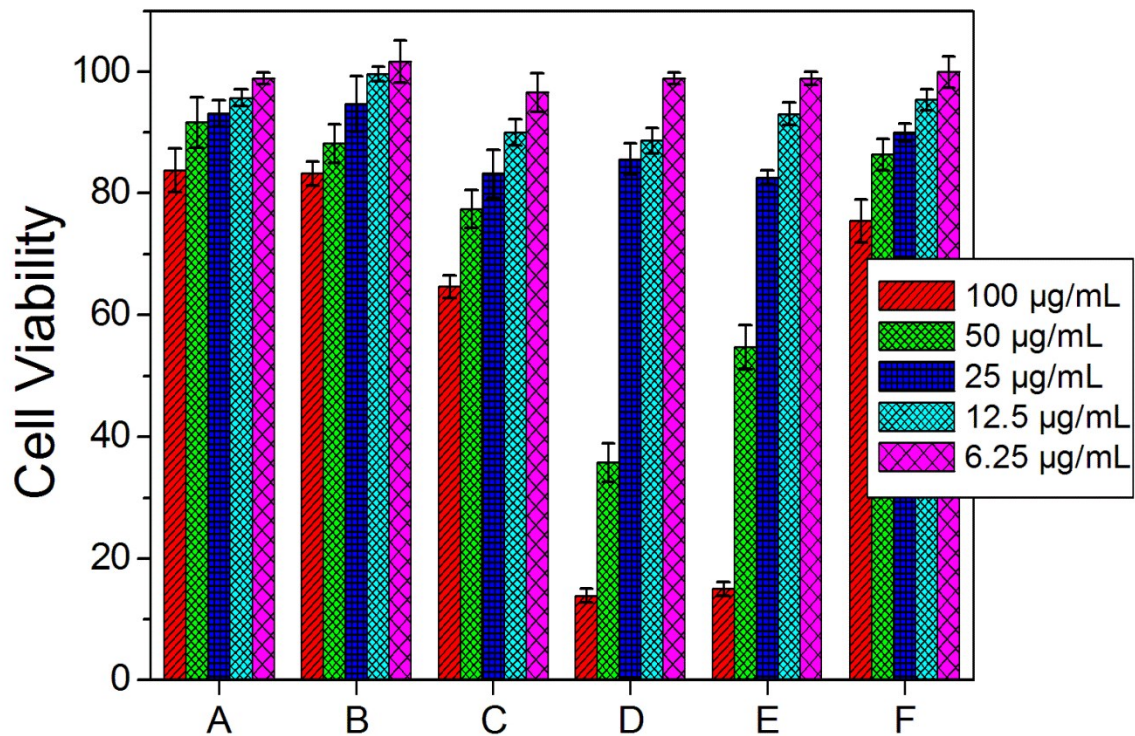

**Figure S2.** The cytotoxic effect of varying concentration of nano particles (6.25-100 µg/mL) on MDAMB-231 cells (after 48 hours) has shown as cell viability vs the dose and time dependence. Results are presented as mean  $\pm$  standard deviation of 3 independent experiments. A – (PMA/A), B- (PMA/T), C- (PMA/A/Ag), D - (PMA/A/Au), E -(PMA/T/Ag), F- (PMA/T/Au)

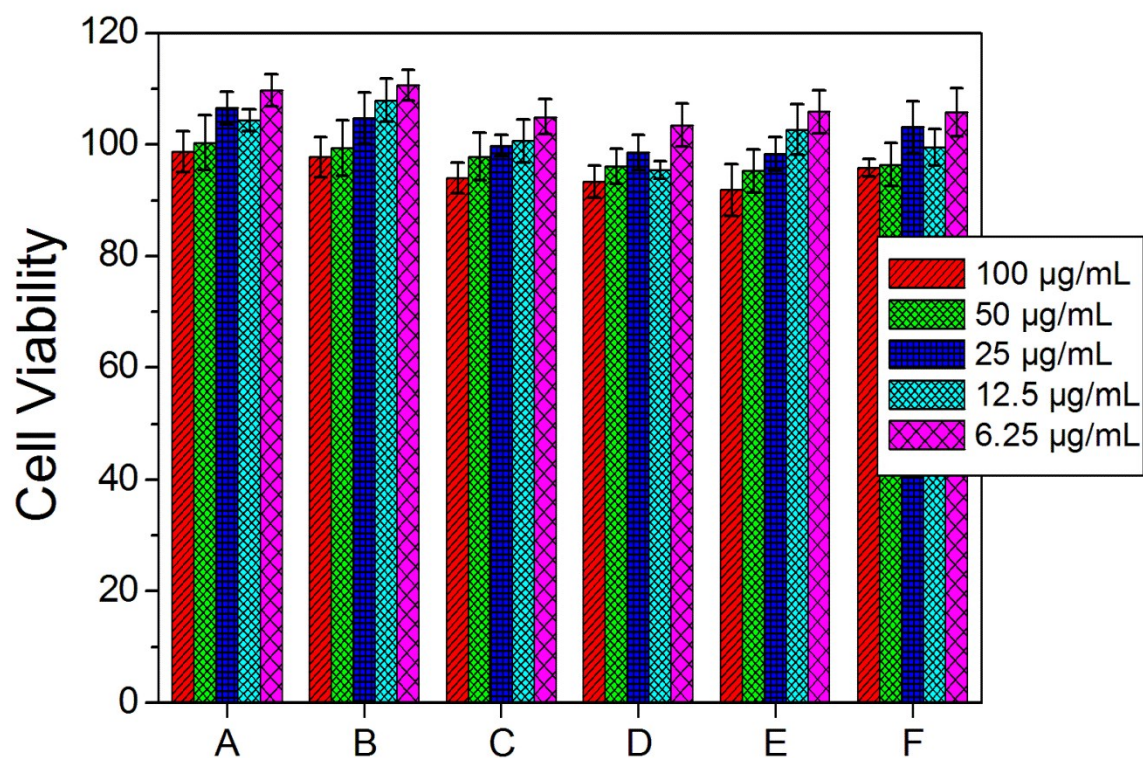

**Figure S3.** The cytotoxic effect of varying concentration of nano particles (6.25-100 µg/mL) on HaCaT (after 72 hours) cells has shown as cell viability vs the dose and time dependence. Results are presented as mean  $\pm$  standard deviation of 3 independent experiments. A – (PMA/A), B- (PMA/T), C- (PMA/A/Ag), D - (PMA/A/Au), E -(PMA/T/Ag), F- (PMA/T/Au)

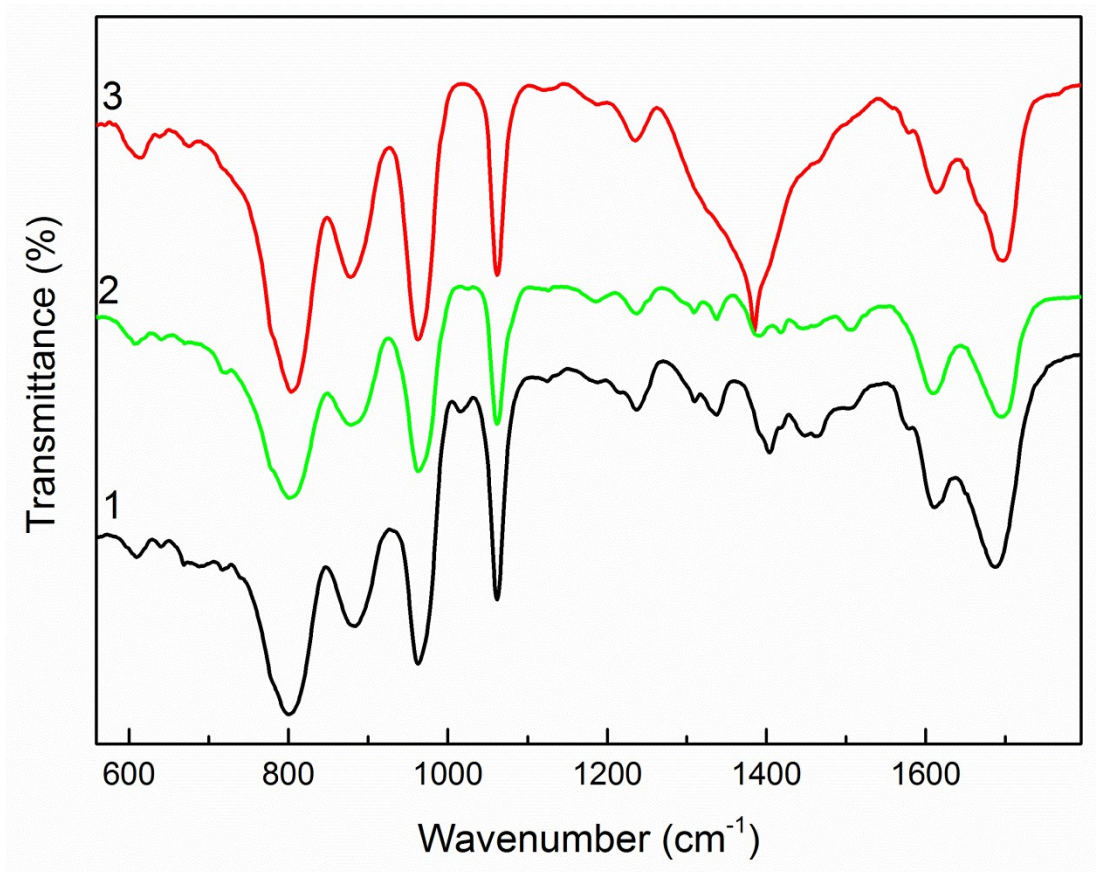

**Figure S4:** FTIR spectra of PMA/A (1), PMA/A/Au (2) and PMA/A/Ag (3)

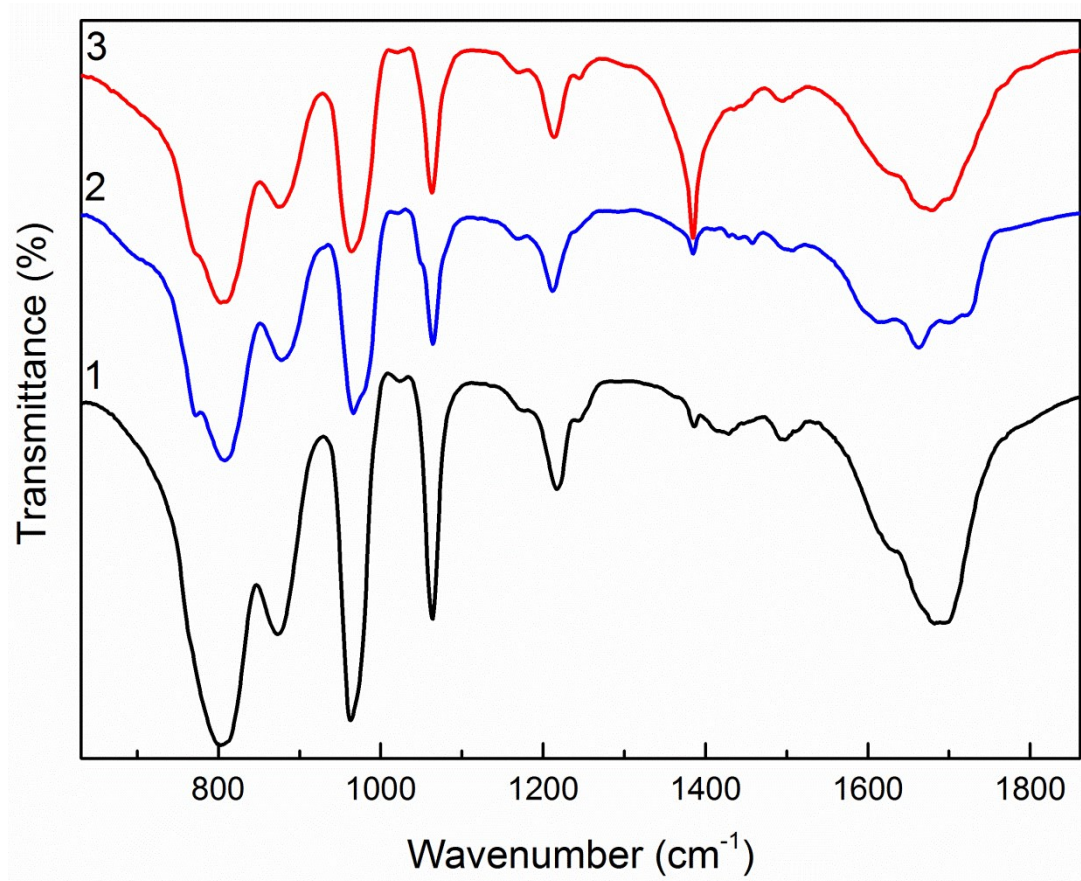

**Figure S5:** FTIR spectra of PMA/T (1), PMA/T/Au (2) and PMA/T/Ag (3)

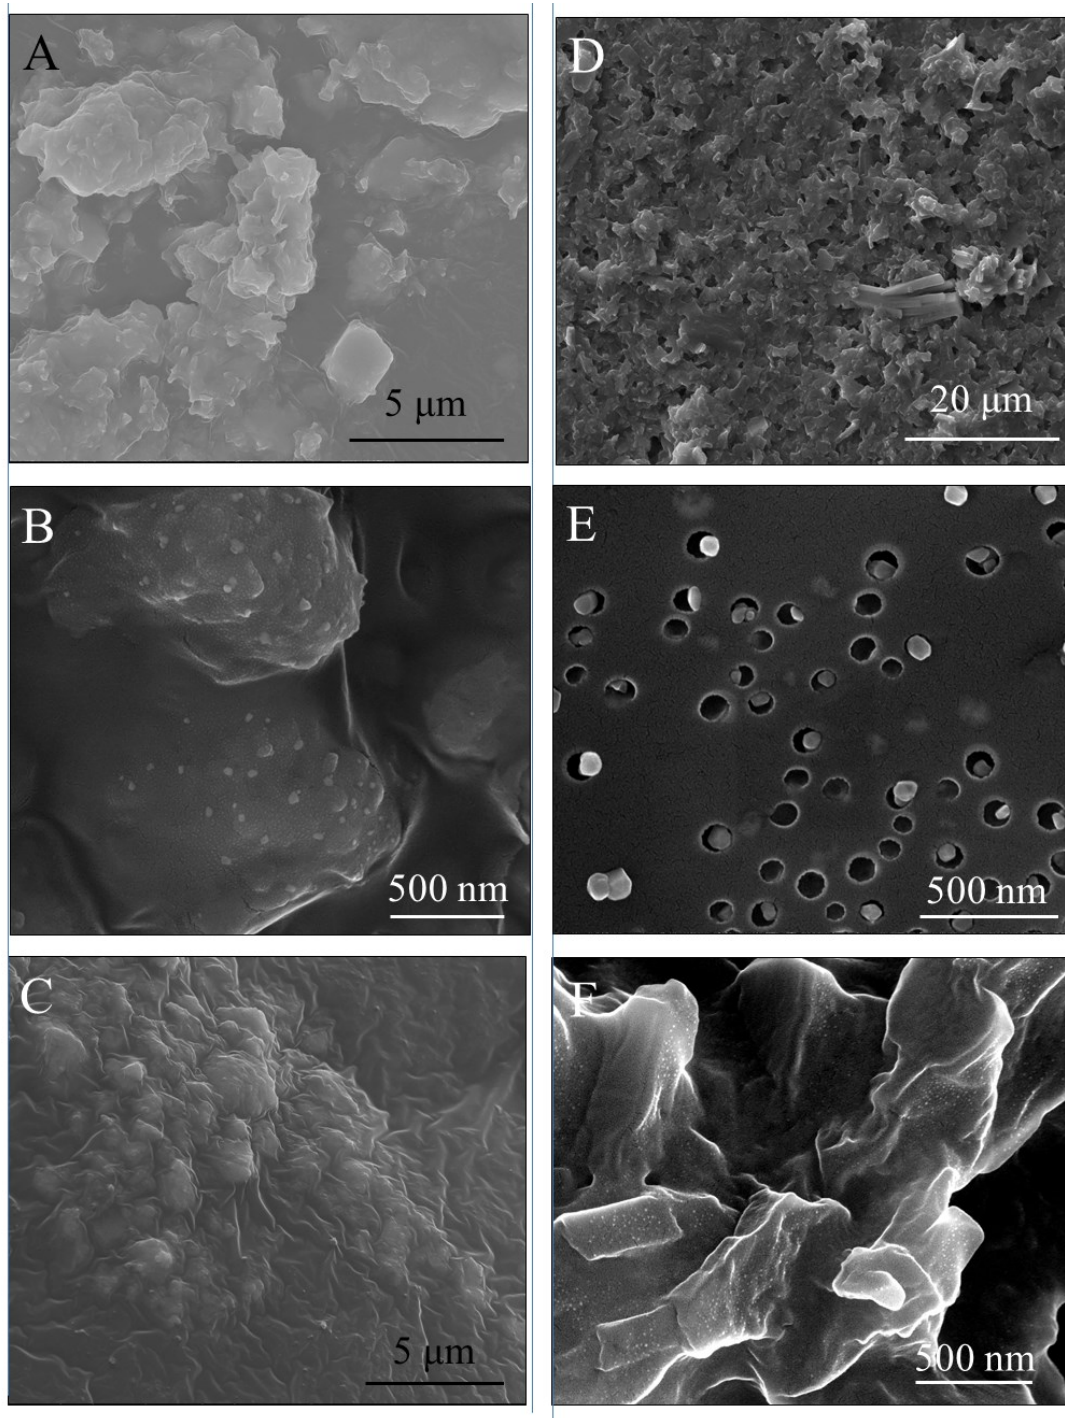

Figure S6. SEM images of (A) PMA/A (B) PMA/A/Ag (C) PMA/A/Au (D) PMA/T (E) PMA/T/Ag (F) PMA/T/Au
